# Supplementary material for: Assessment of the impact of different fecal storage protocols on the microbiota diversity and composition: a pilot study
Source: PubMed Central journal article supplement (PMC6599303; doi:10.1186/s12866-019-1519-2), 2019-06-28

**Supplementary Material for “Assessment of the impact of different fecal storage protocols on the microbiota diversity and composition: a pilot study” (Moossavi et. al.)**

**Supplementary Tables & Figures**

**Table S1. Percent difference in the relative abundances of fecal genera (>1%) between immediate freezing at -80 °C (A) and storage in 95% ethanol for 48h at room temperature (B) in eight healthy volunteers.**

**Table S2. Percent difference in the relative abundances of fecal genera (>1%) between immediate freezing at -80 °C (A) and storage on card stored for 48h at room temperature (C) in eight healthy volunteers.**

**Figure S1. Effect of storage condition on the fecal microbiota profile at species level for abundant species defined as having mean relative abundance of > 0.01% within each method.**

**Figure S2. Comparison of relative abundances of members of Actinobacteria at family level.**

**Figure S3. Comparison of relative abundances of gut microbiota profile at family level across individuals and methods.**

**Table S1. Percent difference in the relative abundances of fecal genera (>1%) between immediate freezing at -80 °C (A) and storage in 95% ethanol for 48h at room temperature (B) in eight healthy volunteers.**

| OTU      | Phylum         | Family                        | Genus                   | 1A-B  | 2A-B  | 3A-B  | 4A-B  | 5A-B  | 6A-B  | 7A-B  | 8A-B  | Mean  |
|----------|----------------|-------------------------------|-------------------------|-------|-------|-------|-------|-------|-------|-------|-------|-------|
| OTU17728 | Firmicutes     | <i>Lachnospiraceae</i>        | Unclass.                | 0.03  | 4.49  | 1.31  | -0.03 | 0.00  | -0.37 | 2.59  | 0.31  | 1.04  |
| OTU7626  | Proteobacteria | <i>Succinivibrionaceae</i>    | <i>Succinivibrio</i>    | 1.27  | 0.00  | 0.01  | 6.39  | 0.01  | -0.01 | 0.00  | 0.00  | 0.96  |
| OTU27599 | Proteobacteria | <i>Alcaligenaceae</i>         | <i>Sutterella</i>       | -0.34 | 0.00  | -0.08 | 0.01  | 0.20  | -0.04 | 0.08  | 0.52  | 0.04  |
| OTU30617 | Firmicutes     | <i>Lachnospiraceae</i>        | <i>Lachnospira</i>      | 1.74  | 0.27  | 0.00  | -0.07 | 0.08  | 0.17  | 6.97  | 0.07  | 1.15  |
| OTU37146 | Firmicutes     | <i>Ruminococcaceae</i>        | <i>Faecalibacterium</i> | 1.49  | -0.38 | 1.26  | -4.32 | -0.29 | -1.20 | -1.40 | -1.46 | -0.79 |
| OTU61854 | Firmicutes     | <i>Ruminococcaceae</i>        | Unclass.                | 0.05  | 0.71  | -0.37 | 0.55  | 1.73  | 0.72  | 0.29  | 0.46  | 0.52  |
| OTU58911 | Bacteroidetes  | <i>Prevotellaceae</i>         | <i>Prevotella</i>       | 0.05  | 0.00  | -0.49 | -0.13 | 0.00  | 0.00  | 0.00  | 0.49  | -0.01 |
| OTU47119 | Bacteroidetes  | <i>Bacteroidaceae</i>         | <i>Bacteroides</i>      | -0.23 | 0.01  | 0.31  | 0.00  | 0.00  | 1.56  | 0.00  | 0.00  | 0.21  |
| OTU27602 | Bacteroidetes  | <i>Bacteroidaceae</i>         | <i>Bacteroides</i>      | 0.68  | 0.08  | 0.49  | 0.02  | 0.22  | 1.58  | -0.44 | 0.42  | 0.38  |
| OTU61659 | Bacteroidetes  | <i>Bacteroidaceae</i>         | <i>Bacteroides</i>      | -1.86 | -0.37 | 0.62  | 0.04  | 0.52  | 0.41  | -0.32 | 0.20  | -0.10 |
| OTU55302 | Bacteroidetes  | <i>Bacteroidaceae</i>         | <i>Bacteroides</i>      | 0.24  | -0.16 | 0.06  | -0.01 | 0.05  | 0.11  | 0.18  | -0.09 | 0.05  |
| OTU3931  | Bacteroidetes  | Unclass. <i>Bacteroidales</i> | Unclass.                | 0.07  | 0.00  | 0.13  | -0.25 | 0.00  | -0.01 | -1.21 | -0.24 | -0.19 |
| OTU63618 | Bacteroidetes  | <i>Prevotellaceae</i>         | <i>Prevotella</i>       | 0.35  | -0.85 | -1.22 | 2.37  | -0.90 | -1.18 | -1.99 | 4.95  | 0.19  |
| OTU58361 | Firmicutes     | <i>Veillonellaceae</i>        | <i>Dialister</i>        | 0.32  | -2.86 | 1.96  | -1.62 | 0.65  | -1.45 | 0.00  | 0.11  | -0.36 |
| OTU63619 | Firmicutes     | <i>Lachnospiraceae</i>        | <i>Roseburia</i>        | 1.52  | 0.23  | -0.17 | -0.08 | 0.11  | 0.34  | 0.17  | -0.35 | 0.22  |
| OTU72224 | Firmicutes     | <i>Lachnospiraceae</i>        | Unclass.                | 0.08  | 0.78  | -2.19 | 0.17  | 0.01  | 0.23  | 2.89  | 0.27  | 0.28  |

**Table S2. Percent difference in the relative abundances of fecal genera (>1%) between immediate freezing at -80 °C (A) and storage on card stored for 48h at room temperature (C) in eight healthy volunteers.**

| OTU      | Phylum         | Family                        | Genus                   | 1A-C  | 2A-C  | 3A-C  | 4A-C  | 5A-C  | 6A-C  | 7A-C  | 8A-C  | Mean  |
|----------|----------------|-------------------------------|-------------------------|-------|-------|-------|-------|-------|-------|-------|-------|-------|
| OTU17728 | Firmicutes     | <i>Lachnospiraceae</i>        | Unclass.                | 0.03  | -3.15 | 2.22  | 0.61  | 0.00  | 0.86  | 0.94  | 0.31  | 0.23  |
| OTU7626  | Proteobacteria | <i>Succinivibrionaceae</i>    | <i>Succinivibrio</i>    | 1.27  | 0.00  | 0.01  | 13.87 | 0.01  | 0.00  | -0.01 | 0.00  | 1.89  |
| OTU27599 | Proteobacteria | <i>Alcaligenaceae</i>         | <i>Sutterella</i>       | 1.52  | -0.03 | 0.49  | 0.01  | 0.01  | 0.11  | -0.04 | 0.48  | 0.32  |
| OTU30617 | Firmicutes     | <i>Lachnospiraceae</i>        | <i>Lachnospira</i>      | 2.41  | 0.21  | 0.00  | 0.10  | 0.01  | 0.21  | 1.83  | 0.07  | 0.60  |
| OTU37146 | Firmicutes     | <i>Ruminococcaceae</i>        | <i>Faecalibacterium</i> | 0.81  | -0.48 | 2.66  | -4.48 | -0.15 | 0.09  | 0.02  | -1.59 | -0.39 |
| OTU61854 | Firmicutes     | <i>Ruminococcaceae</i>        | Unclass.                | 0.05  | -0.46 | -0.78 | -0.96 | -0.32 | -0.18 | -0.27 | -0.31 | -0.41 |
| OTU58911 | Bacteroidetes  | <i>Prevotellaceae</i>         | <i>Prevotella</i>       | 0.05  | 0.00  | -0.46 | -0.94 | 0.00  | 0.00  | -0.01 | 3.66  | 0.29  |
| OTU47119 | Bacteroidetes  | <i>Bacteroidaceae</i>         | <i>Bacteroides</i>      | 0.49  | 0.01  | 0.86  | 0.00  | 0.00  | 1.95  | 0.01  | 0.00  | 0.41  |
| OTU27602 | Bacteroidetes  | <i>Bacteroidaceae</i>         | <i>Bacteroides</i>      | -0.35 | 0.12  | 0.75  | 1.15  | -0.50 | 0.27  | 0.07  | 0.07  | 0.20  |
| OTU61659 | Bacteroidetes  | <i>Bacteroidaceae</i>         | <i>Bacteroides</i>      | -1.89 | -0.15 | 0.59  | 0.09  | 0.35  | -0.04 | -0.48 | 0.18  | -0.17 |
| OTU55302 | Bacteroidetes  | <i>Bacteroidaceae</i>         | <i>Bacteroides</i>      | 0.81  | -0.17 | 0.10  | 0.70  | -0.01 | 0.33  | 0.02  | 0.04  | 0.23  |
| OTU3931  | Bacteroidetes  | Unclass. <i>Bacteroidales</i> | Unclass.                | 0.07  | 0.00  | 0.13  | 2.80  | 0.00  | 0.00  | 0.18  | 2.08  | 0.66  |
| OTU63618 | Bacteroidetes  | <i>Prevotellaceae</i>         | <i>Prevotella</i>       | 0.35  | 2.88  | -0.88 | 7.78  | -0.10 | 0.74  | -0.80 | 5.92  | 1.99  |
| OTU58361 | Firmicutes     | <i>Veillonellaceae</i>        | <i>Dialister</i>        | 0.25  | 0.42  | -3.53 | -2.39 | -0.37 | -0.70 | 0.00  | 0.11  | -0.78 |
| OTU63619 | Firmicutes     | <i>Lachnospiraceae</i>        | <i>Roseburia</i>        | -2.56 | -0.97 | -1.46 | -1.03 | -0.07 | 0.00  | -0.04 | -3.32 | -1.18 |
| OTU72224 | Firmicutes     | <i>Lachnospiraceae</i>        | Unclass.                | -0.05 | -0.54 | -2.72 | -0.20 | -0.03 | -0.45 | 0.58  | 0.19  | -0.40 |

Figure S1. Effect of storage condition on the fecal microbiota profile at species level for abundant species defined as having mean relative abundance of > 0.01% within each method.

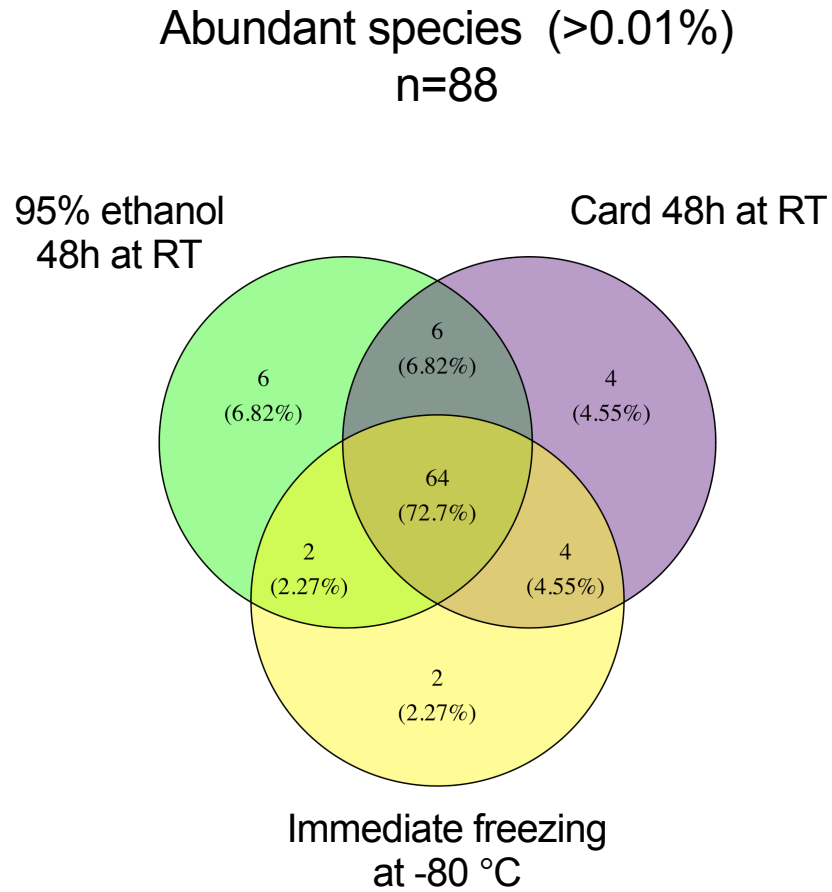

**Figure S2. Comparison of relative abundances of members of Actinobacteria at family level. A) across individuals and B) across methods.**

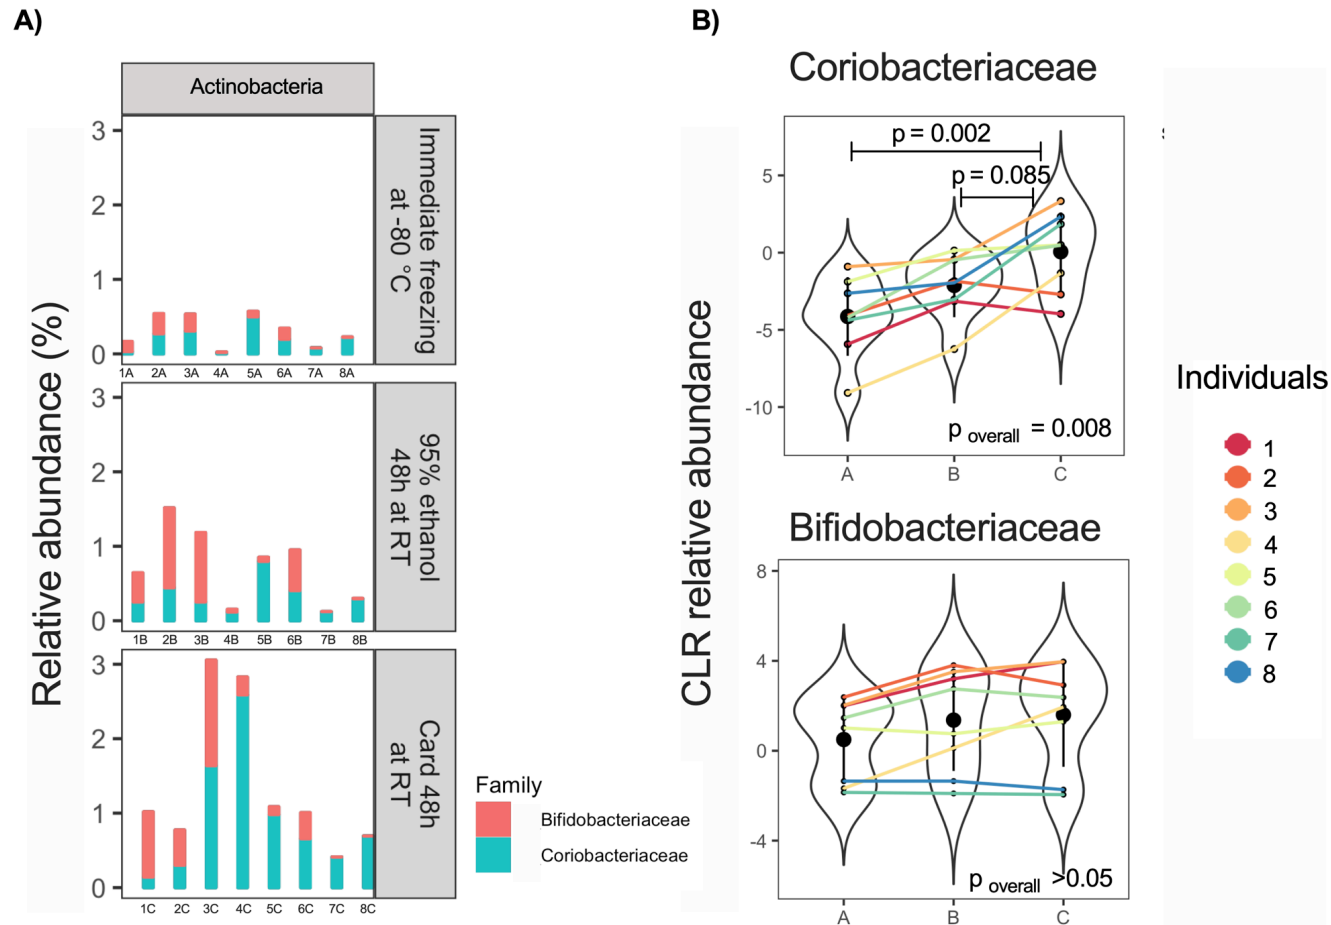

**A:** Immediate freezing at -80 °C ; **B:** 95% ethanol 48h at RT; **C:** Card 48h at RT

**Figure S3. Comparison of relative abundances of gut microbiota profile at family level across individuals and methods.**

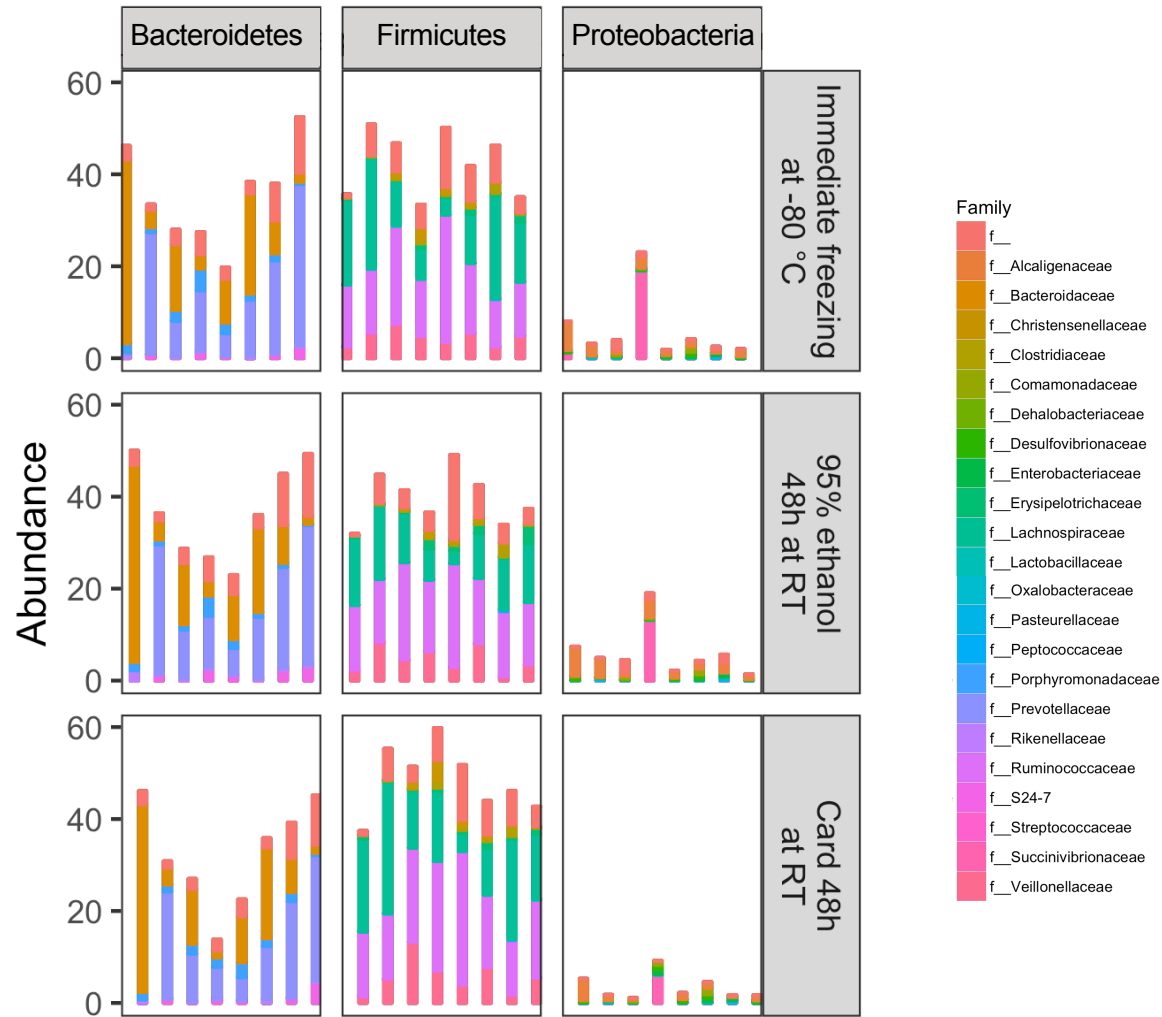

Supplement: 12866_2019_1519_MOESM1_ESM.pdf [file 12866_2019_1519_MOESM1_ESM.pdf]
